# Supplementary material for: Borophosphene as a promising Dirac anode with large capacity and high-rate capability for sodium-ion batteries
Source: Royal Society of Chemistry journal article supplement (doi:10.1039/d0cp03202f), 2020-01-01
Supplement: d0cp03202f1.pdf [file d0cp03202f1.pdf]

## Supporting information:

### Borophosphene as a promising Dirac anode with large capacity and high-rate capability for sodium-ion batteries

Yang Zhang\*, Er-Hu Zhang, Ming-Gang Xia, Sheng-Li Zhang

*Ministry of Education Key Laboratory for Nonequilibrium Synthesis and Modulation of Condensed Matter,*

*Department of Applied Physics, School of Science, Xi'an Jiaotong University, Xi'an 710049, China*

\*Corresponding author.

E-mail: [yzhang520@mail.xjtu.edu.cn](mailto:yzhang520@mail.xjtu.edu.cn) (Y. Zhang)

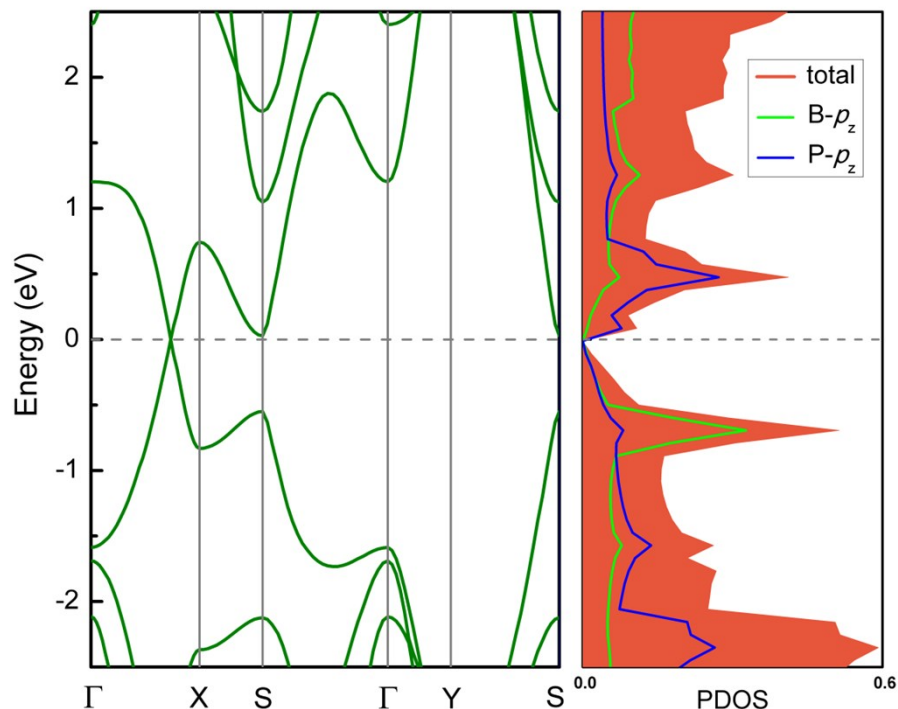

**Fig. S1** Calculated band structure and partial density of states (PDOS) of borophosphene. Dash line denotes the Fermi level.

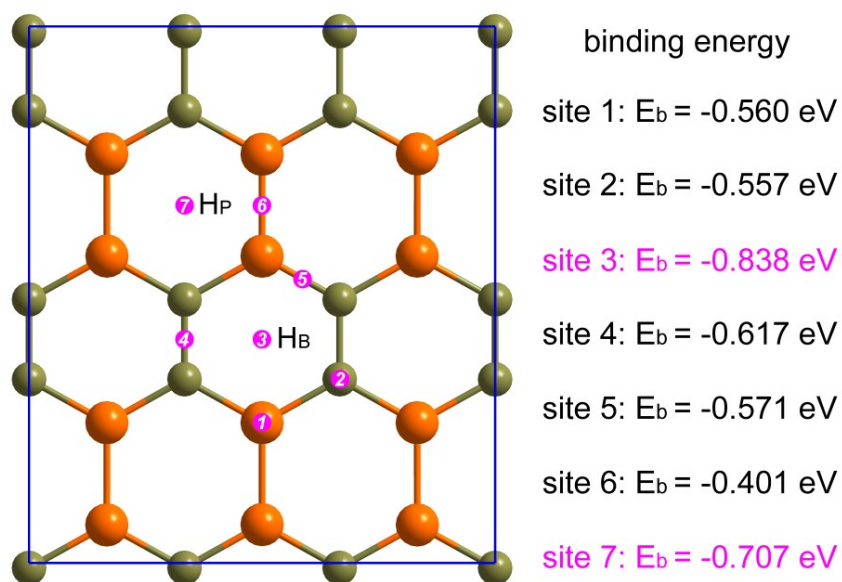

**Fig. S2** Schematic diagram for Na adsorption on borophosphene surface. Binding energy at different adsorption sites are shown in right panel. Dark yellow and orange balls denote B and P atoms.

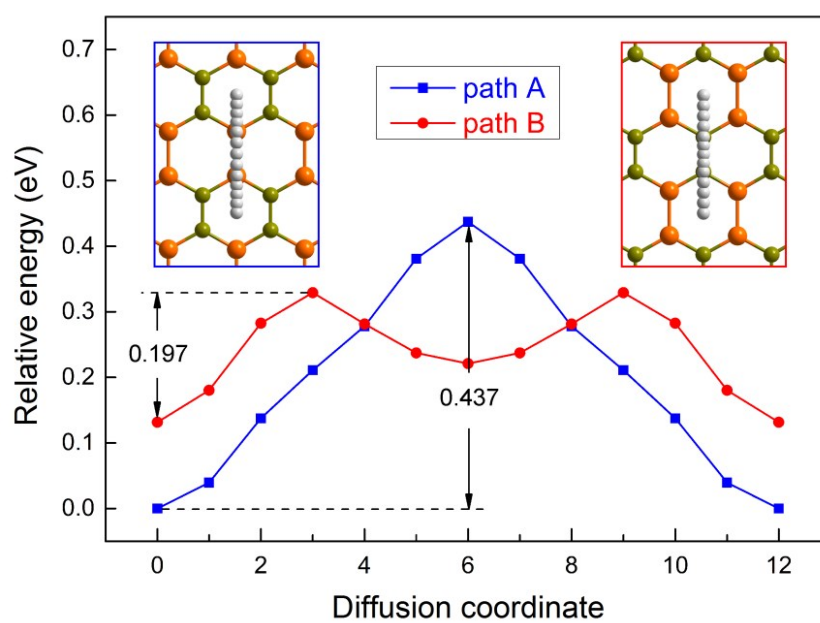

**Fig. S3** Diffusion energy barrier of Na atom migrating parallel to B-B or P-P dimer direction. Inserts display the corresponding diffusion pathways: path A (left) and path B (right).

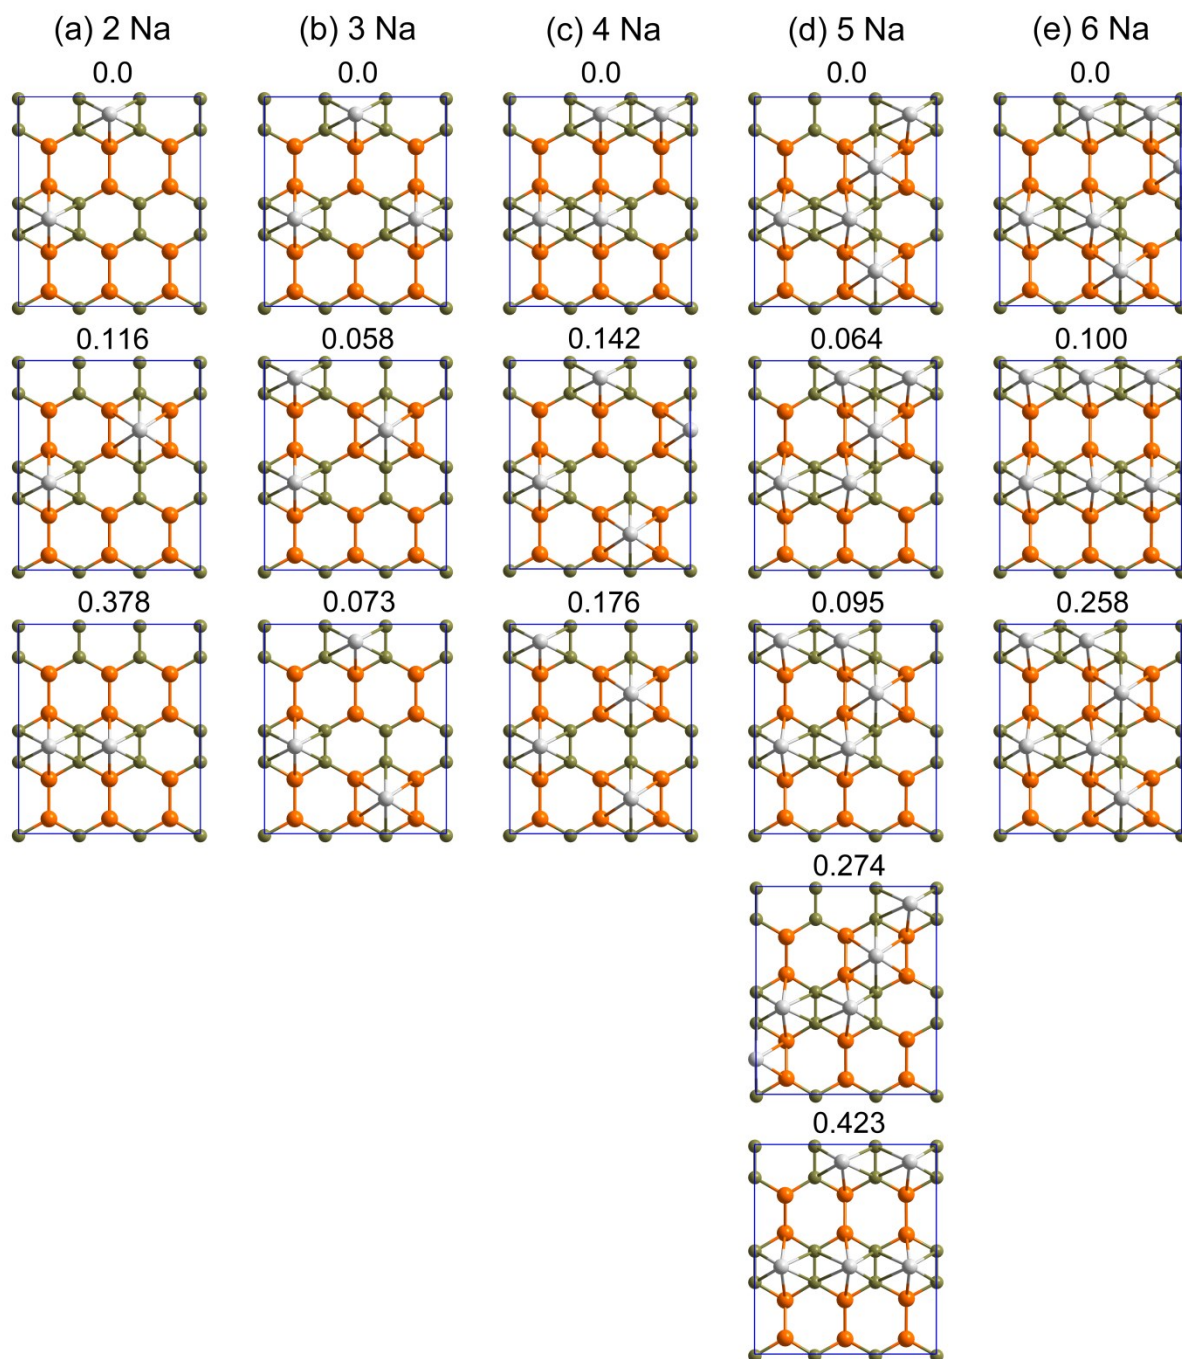

**Fig. S4** Various adsorption configurations with relative total energy for  $\text{Na}_x\text{BP}$  species at different Na contents: (a)  $x = 0.167$ , (b)  $x = 0.25$ , (c)  $x = 0.333$ , (d)  $x = 0.417$  and (e)  $x = 0.5$ . Dark yellow, orange and gray balls denote B, P and Na atoms, respectively.

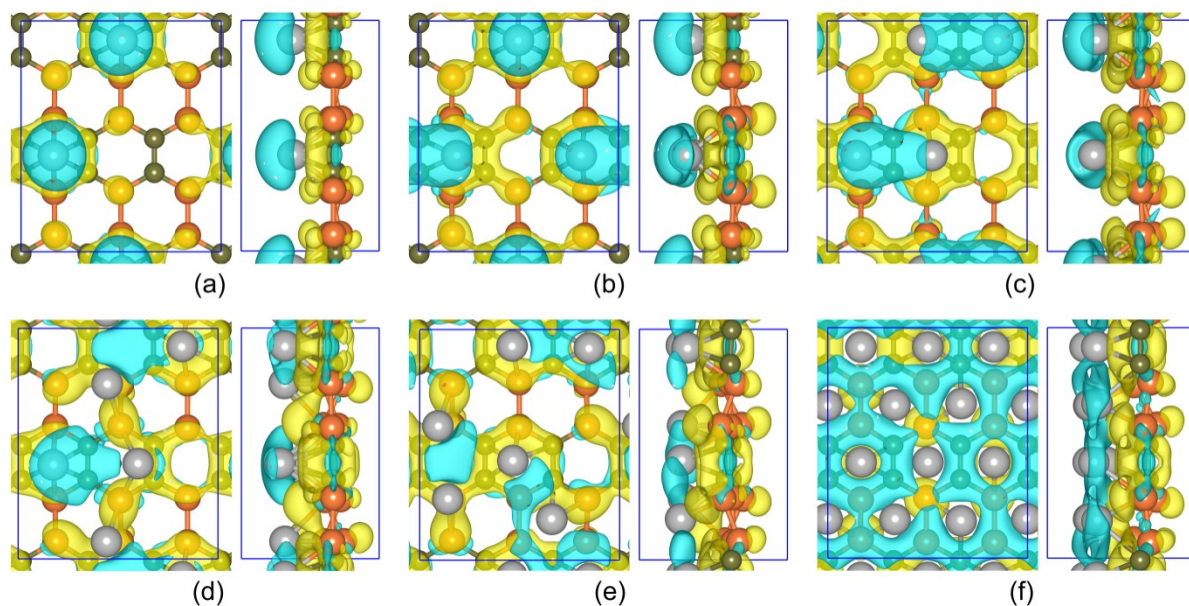

**Fig. S5** Difference of charge density of  $\text{Na}_x\text{BP}$  species with different Na contents: (a)  $x = 0.167$ , (b)  $x = 0.25$ , (c)  $x = 0.333$ , (d)  $x = 0.417$ , (e)  $x = 0.5$  and (f)  $x = 1.0$ . Yellow and turquoise isosurfaces represent electron accumulation ( $\Delta\rho > 0$ ) and depletion ( $\Delta\rho < 0$ ), and the isosurface level is set to  $0.004 \text{ e}/\text{\AA}^3$ .

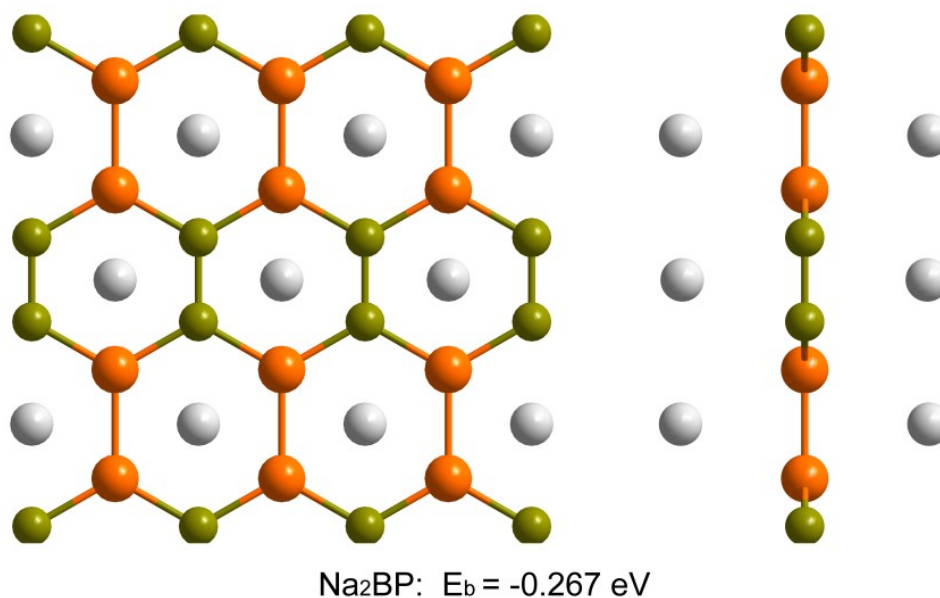

**Fig. S6** Optimized adsorption configuration for  $\text{Na}_2\text{BP}$  specie. Its binding energy is  $-0.267 \text{ eV}$ .



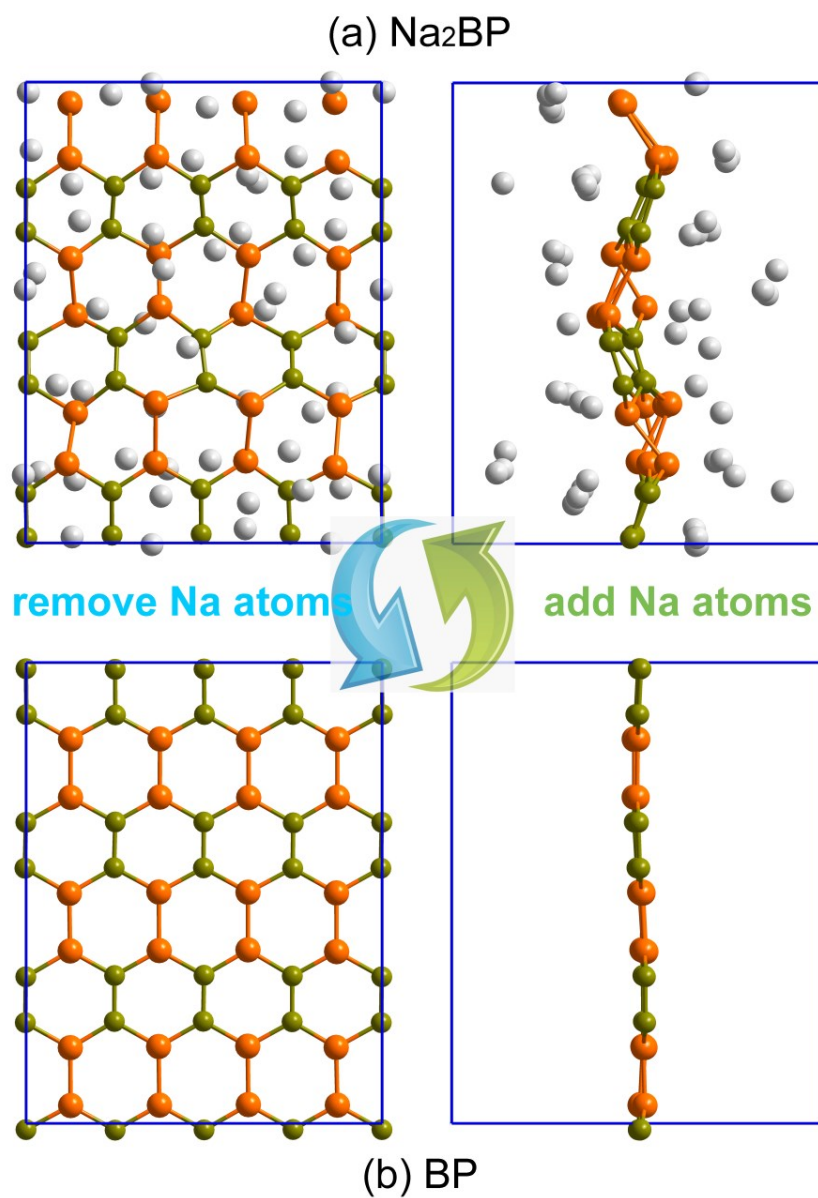

**Fig. S7** Snapshots of geometrical configurations after 10 ps AIMD simulation for (a)  $\text{Na}_2\text{BP}$  and (b) the remaining corrugated borophosphene after removing all Na atoms from  $\text{Na}_2\text{BP}$ .

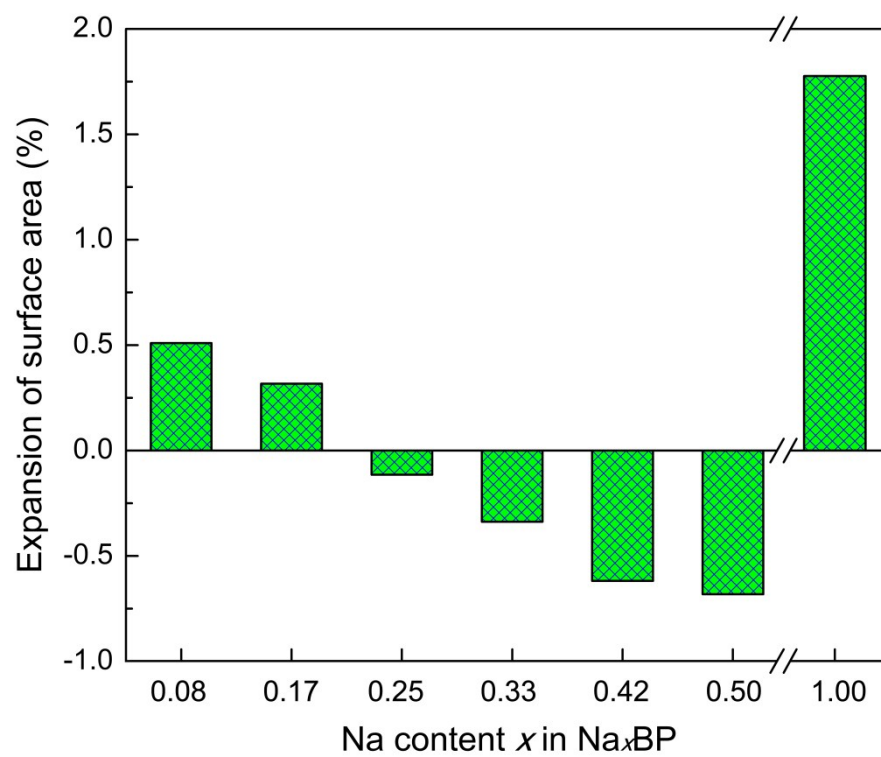

**Fig. S8** Expansion of surface area as a functional of Na content  $x$  in  $\text{Na}_x\text{BP}$ .
